# Supplementary material for: The secretor status of blood group antigens in the saliva in people with oral cancers: a systematic review
Source: Springer Nature journal article supplement (doi:10.1186/s13643-023-02399-8), 2024-01-02
Supplement: MOESM1 [file 26583896]

| Number # | Searches                                                                                                                                                                                                                                                                                                                                                                                                                                                             | Results |
|----------|----------------------------------------------------------------------------------------------------------------------------------------------------------------------------------------------------------------------------------------------------------------------------------------------------------------------------------------------------------------------------------------------------------------------------------------------------------------------|---------|
| 1        | ABO BloodGroup System/ or ABO blood group*.mp.                                                                                                                                                                                                                                                                                                                                                                                                                       | 16612   |
| 2        | ABO blood group antigen*.mp.                                                                                                                                                                                                                                                                                                                                                                                                                                         | 215     |
| 3        | "Blood Grouping and Crossmatching"/                                                                                                                                                                                                                                                                                                                                                                                                                                  | 4847    |
| 4        | ABO blood group type*.mp.                                                                                                                                                                                                                                                                                                                                                                                                                                            | 27      |
| 5        | ABO blood type*.mp.                                                                                                                                                                                                                                                                                                                                                                                                                                                  | 653     |
| 6        | ABO.mp.                                                                                                                                                                                                                                                                                                                                                                                                                                                              | 20972   |
| 7        | blood type*.mp.                                                                                                                                                                                                                                                                                                                                                                                                                                                      | 3305    |
| 8        | Blood group*.mp. or Blood Group Antigens/                                                                                                                                                                                                                                                                                                                                                                                                                            | 52003   |
| 9        | 1 or 2 or 3 or 4 or 5 or 6 or 7 or 8                                                                                                                                                                                                                                                                                                                                                                                                                                 | 55846   |
| 10       | Saliva/ or Saliva*.mp.                                                                                                                                                                                                                                                                                                                                                                                                                                               | 130260  |
| 11       | salivation.mp. or Salivation/                                                                                                                                                                                                                                                                                                                                                                                                                                        | 6306    |
| 12       | saliva analysis.mp.                                                                                                                                                                                                                                                                                                                                                                                                                                                  | 133     |
| 13       | saliva.tw.                                                                                                                                                                                                                                                                                                                                                                                                                                                           | 50106   |
| 14       | 10 or 11 or 12 or 13                                                                                                                                                                                                                                                                                                                                                                                                                                                 | 130260  |
| 15       | Mouth/                                                                                                                                                                                                                                                                                                                                                                                                                                                               | 23487   |
| 16       | Lip/                                                                                                                                                                                                                                                                                                                                                                                                                                                                 | 11810   |
| 17       | Gingiva/                                                                                                                                                                                                                                                                                                                                                                                                                                                             | 18919   |
| 18       | Tongue/                                                                                                                                                                                                                                                                                                                                                                                                                                                              | 19662   |
| 19       | Oropharynx/                                                                                                                                                                                                                                                                                                                                                                                                                                                          | 4689    |
| 20       | Hypopharynx/                                                                                                                                                                                                                                                                                                                                                                                                                                                         | 2177    |
| 21       | Palate/                                                                                                                                                                                                                                                                                                                                                                                                                                                              | 10784   |
| 22       | Cheek/                                                                                                                                                                                                                                                                                                                                                                                                                                                               | 7860    |
| 23       | 15 or 16 or 17 or 18 or 19 or 20 or 21 or 22                                                                                                                                                                                                                                                                                                                                                                                                                         | 92681   |
| 24       | (Mouth/ or Lip/ or Gingiva/ or Tongue/ or Oropharynx/ or Hypopharynx/ or Palate/ or Cheek/) adj3 (cancer* or neoplasm* or tumor* or malignancy* or carcinoma* or dysplasia*).mp. [mp=title, abstract, original title, name of substance word, subject heading word, floating sub-heading word, keyword heading word, organism supplementary concept word, protocol supplementary concept word, rare disease supplementary concept word, unique identifier, synonyms] | 14088   |

|    |                                                                                                                                                                                                                                                                                                                                                                                |       |
|----|--------------------------------------------------------------------------------------------------------------------------------------------------------------------------------------------------------------------------------------------------------------------------------------------------------------------------------------------------------------------------------|-------|
| 25 | Mouth Neoplasms/ or Mouth Neoplasm*.mp                                                                                                                                                                                                                                                                                                                                         | 38377 |
| 26 | Lip Neoplasms/                                                                                                                                                                                                                                                                                                                                                                 | 4313  |
| 27 | Gingival Neoplasms/                                                                                                                                                                                                                                                                                                                                                            | 2432  |
| 28 | Tongue Neoplasms/                                                                                                                                                                                                                                                                                                                                                              | 10629 |
| 29 | Oropharyngeal Neoplasms/                                                                                                                                                                                                                                                                                                                                                       | 6765  |
| 30 | Hypopharyngeal Neoplasms/                                                                                                                                                                                                                                                                                                                                                      | 3405  |
| 31 | Palatal Neoplasms/                                                                                                                                                                                                                                                                                                                                                             | 3031  |
| 32 | (oral adj5 (cancer* or neoplasm* or tumor* or malignancy* or carcinoma or dysplasia*)).mp. [mp=title, abstract, original title, name of substance word, subject heading word, floating sub-heading word, keyword heading word, organism supplementary concept word, protocol supplementary concept word, rare disease supplementary concept word, unique identifier, synonyms] | 44155 |
| 33 | (Lip Neoplasm* or Gingival Neoplasm* or Tongue Neoplasm* or Oropharyngeal Neoplasm* or Hypopharyngeal Neoplasm* or Palatal Neoplasm*).mp.                                                                                                                                                                                                                                      | 28629 |
| 34 | 24 or 25 or 26 or 27 or 28 or 29 or 30 or 31 or 32 or 33                                                                                                                                                                                                                                                                                                                       | 88650 |
| 35 | 9 and 14 and 34                                                                                                                                                                                                                                                                                                                                                                | 13    |
